# Supplementary material for: The Impact of Basal Roughness on Inland Thwaites Glacier Sliding
Source: PubMed Central journal article supplement — Geophys Res Lett. 2022 Jul 18;49(14):e2021GL096564. doi: 10.1029/2021GL096564 (PMC9541487; doi:10.1029/2021gl096564), 2022-07-18
Supplement: GRL-49-e2021GL096564-s001.pdf [file GRL-49-e2021GL096564-s001.pdf]

1  
2  
3  
4  
5  
6  
7  
8  
9  
10  
11  
12  
13  
14  
15  
16

*Geophysical Research Letters*

Supporting Information for

**The impact of basal roughness on inland Thwaites Glacier sliding.**

Andrew O. Hoffman<sup>1,2</sup>, Knut Christianson<sup>1</sup>, Nicholas Holschuh<sup>3</sup>, Elizabeth Case<sup>4</sup>, Jonathan Kingslake<sup>4</sup>, Robert Arthern<sup>5</sup>

<sup>1</sup>Department of Earth and Space Sciences, University of Washington, Seattle, Washington 98195

<sup>2</sup>Polar Science Center, Applied Physics Laboratory, University of Washington, Seattle, Washington 98195

<sup>3</sup>Department of Geology, Amherst College, Amherst, Massachusetts 01002-5000

<sup>4</sup>Department of Earth and Environmental Sciences, Columbia University, New York, New York 10027

<sup>5</sup>British Antarctic Survey, Cambridge, UK

17

18

19 **Table of Contents**

20 S1. Overview ..... 2

21 S2. Data ..... 3

22     Figure S1. 3

23     Figure S2. 3

24     Figure S3. 4

25 S3. Inversions ..... 5

26     Figure S4. 5

27     Figure S5. 5

28     Figure S6. 6

29     Table S1. 6

30 S4. Analytic Slip length Calculation..... 7

31 S5. Consistency with subglacial lake activity? ..... 8

32 S6. Simulations over a uniformly sloped bed topography ..... 9

33     Figure S7. 9

34

35 **S1. Overview**

36 The supplement is organized in two sections of supplement material (figures and table) with a  
37 final text section that elaborates upon methods used in the paper. We first present all filtered  
38 topographies, surface elevation and surface velocity data used in each model experiment  
39 (Figures S1-S3). We then show inversions for all inferred friction coefficient fields (Figures S4-  
40 S5) determined from the Tikhonov regularization procedure outlined in Figure S6. Model  
41 parameters are detailed in Table S1. We also describe the power-law fitting procedure used to  
42 analytically glacier derive slip length from the topography.

43

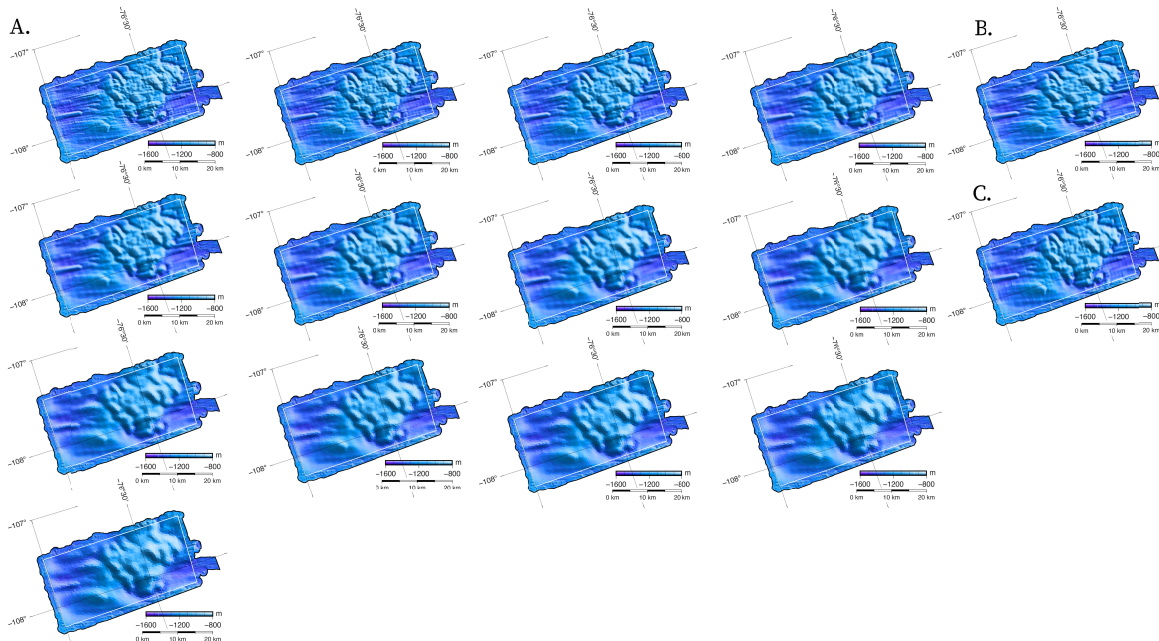

46  
 49 **Supplementary Figure 1.** The (A) topographies of the isotropically filtered grids for  
 50 lower Thwaites Glacier, and the (B) along-flow and (C) transverse anisotropically filtered  
 51 topographies for the lower Thwaites Glacier grid.  
 50

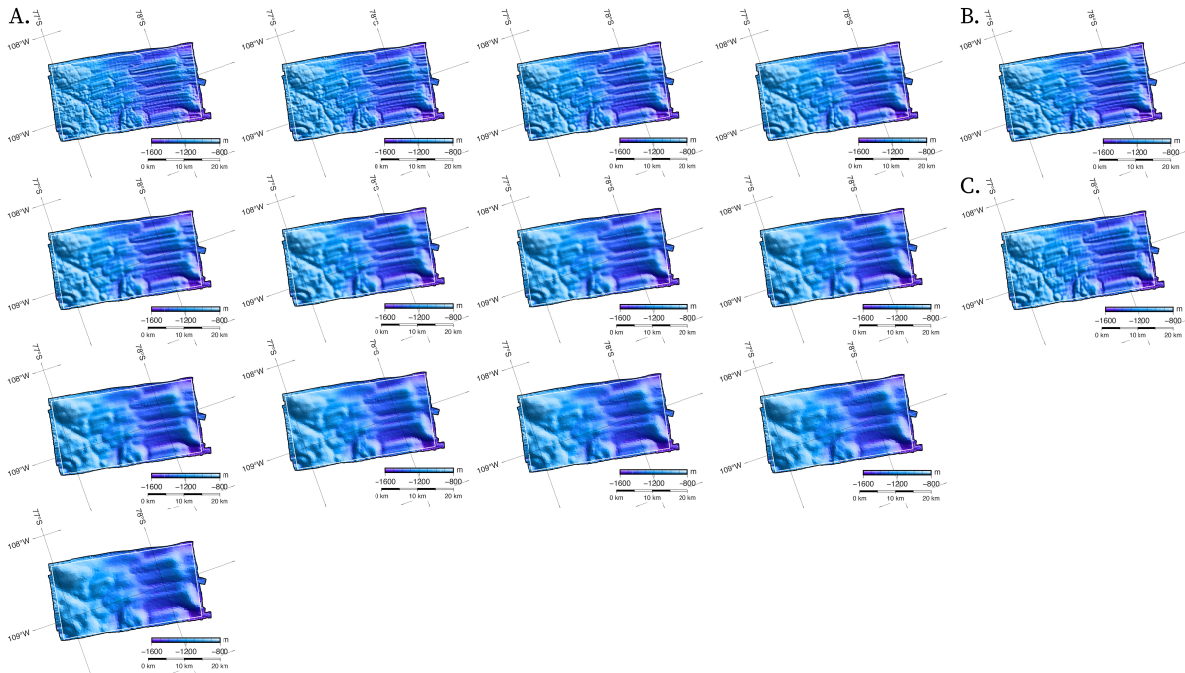

51  
 54 **Supplementary Figure 2.** The (A) topographies of the isotropically filtered grids for upper  
 55 Thwaites Glacier, and the (B) along-flow and (C) transverse anisotropically filtered  
 56 topographies for the upper Thwaites Glacier grid.  
 55

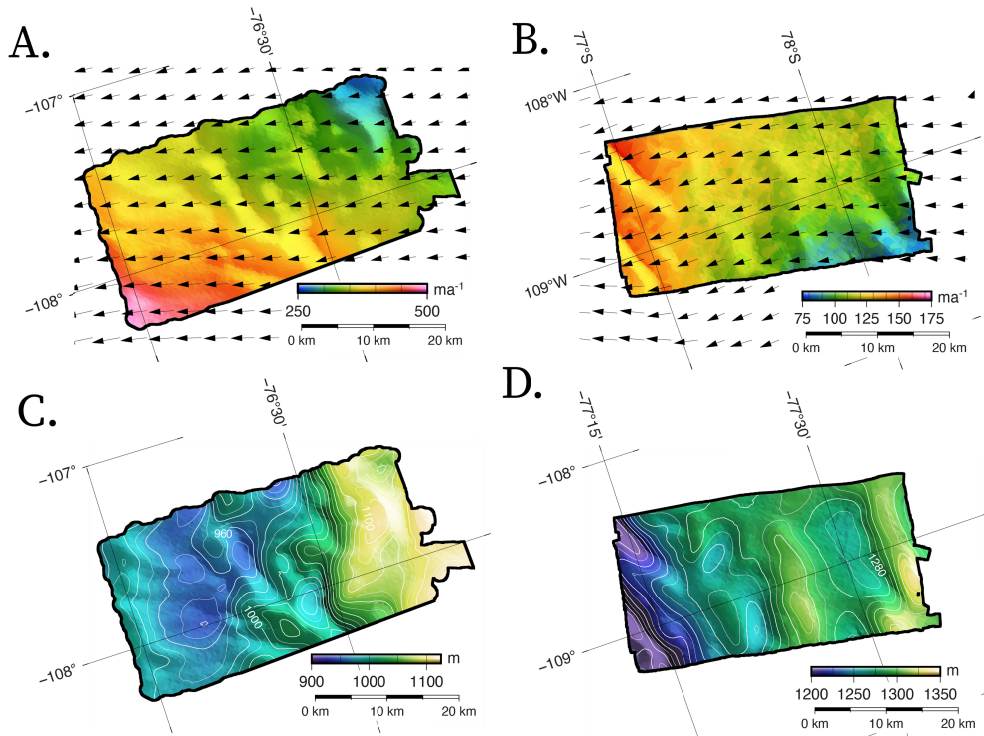

56  
58  
59  
59  
60

**Supplementary Figure 3.** The (A, B) surface velocity and (C, D) surface elevation for the lower Thwaites and upper Thwaites grids. Note, color maps are scaled uniquely for each grid.

61 **S3. Inversions**

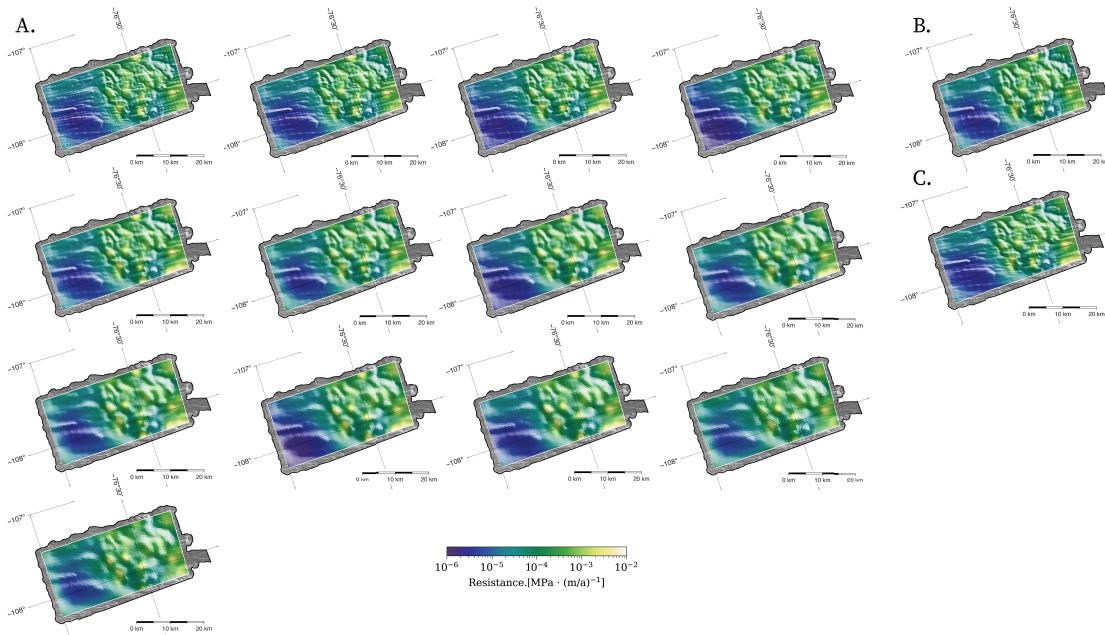

62  
65 **Supplementary Figure 4.** The (A) inferred friction coefficient of each of the isotropically  
66 filtered lower Thwaites grid simulations, and the (B) along-flow and (C) transverse  
67 anisotropically filtered topographies for the lower Thwaites Glacier grids.  
68

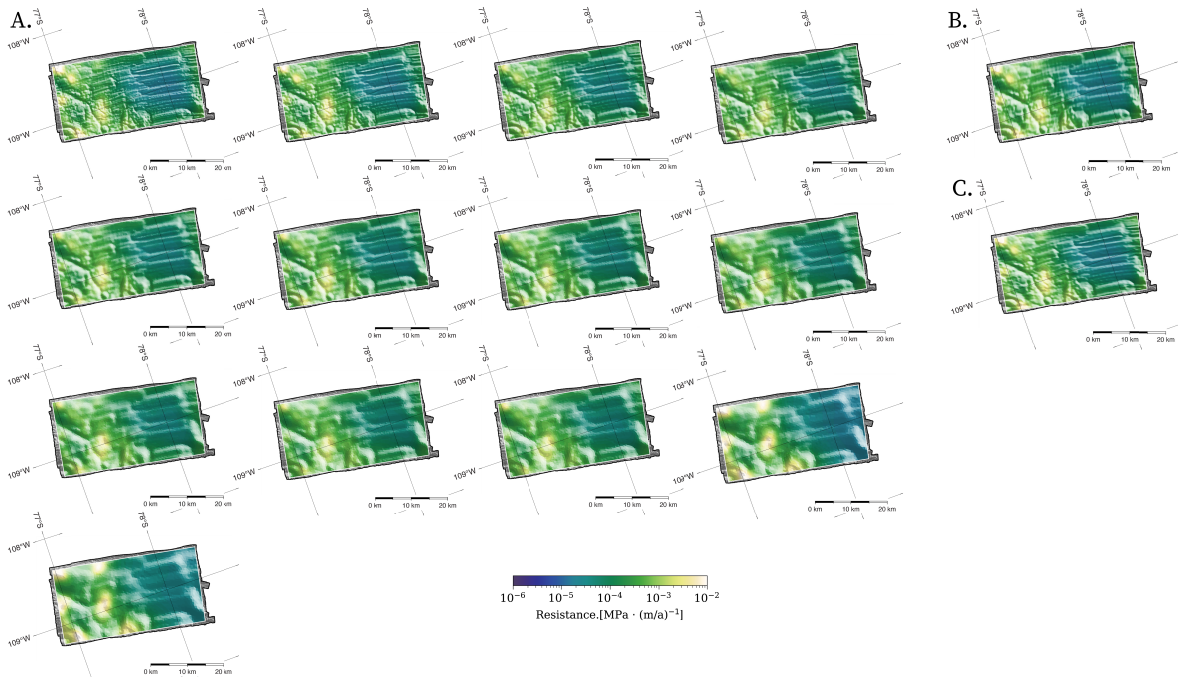

70  
71 **Supplementary Figure 5.** The (A) inferred friction coefficient of each of the isotropically  
72 filtered upper Thwaites grid simulations, and the (B) along-flow and (C) transverse  
73 anisotropically filtered topographies for the upper Thwaites Glacier grids.  
74

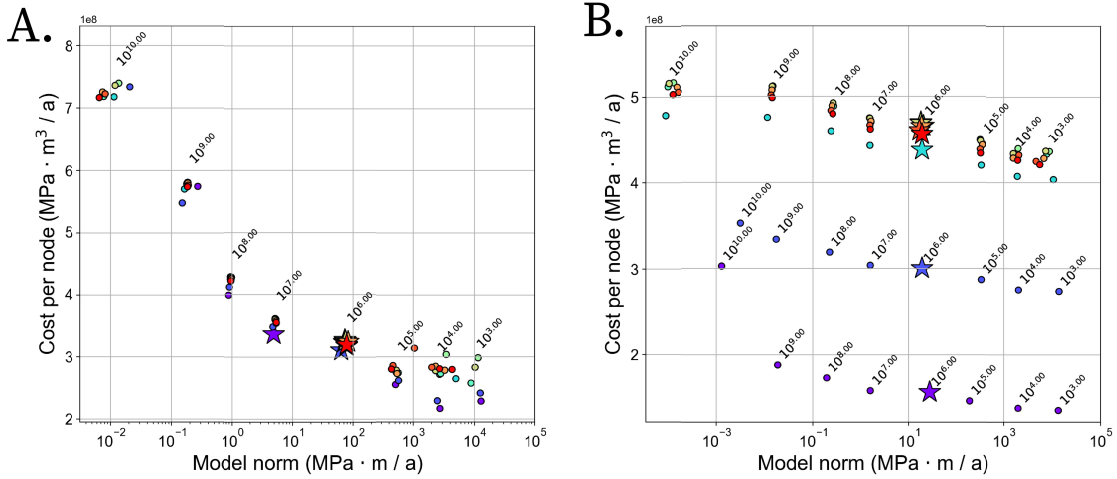

72  
73  
81  
82  
83  
84  
85  
86  
87  
88  
82  
83

**Supplementary Figure 6.** The Tikhonov regularization curves (cost function plotted against the mean square gradient of beta for  $\log_{10} \lambda = 10e^3, 10e^4, 10e^5, \dots, 10e^{10}$ ) for the (A) lower Thwaites and the (B) upper Thwaites grids where rainbow colors indicate model grid resolution (purple is highest resolution, blue second highest etc.). Between  $10e^6$  and  $10e^7$ , the cost function increases dramatically, and the L-curve method would select a value in this range as the appropriate regularization parameter (indicated with a star). For both the lower Thwaites and upper Thwaites grids, the highest resolution model domain minimizes the most cost per node.

| Parameter | Value          | Units                    | Description                                          |
|-----------|----------------|--------------------------|------------------------------------------------------|
| $A_0$     | $3.985e^{-13}$ | $MPa^{-3} \cdot yr^{-1}$ | Spatially uniform rate factor                        |
| $Q$       | $60e^3$        | $J$                      | Spatially uniform activation energy (Patterson 2010) |
| $R$       | 8.314          | $J/mol \cdot K$          | Ideal gas constant                                   |
| $\lambda$ | $10e^6$        | —                        | Tikhonov regularization coefficients                 |
| $n$       | 3              | —                        | Glen's flow law exponent                             |
| $m$       | 1              | —                        | Basal sliding relation exponent                      |

84  
85  
86

**Supplementary Table 1.** Table of model parameters used across all full-Stokes simulations.

86

#### 87 **S4. Analytic Slip Length Calculation**

88 In glacier sliding theory, slip length ( $L$ ) is defined as:

89

$$L = \frac{\eta}{\beta} \quad (1)$$

90 where  $\eta$  is ice viscosity and  $\beta$  is the basal drag coefficient. If the slip length is larger than the  
91 ice thickness, the basal drag is too small to induce shear in the ice column, and ice slides over  
92 the substrate at a uniform velocity with depth (plug flow). If the slip length is smaller than the  
93 ice thickness, then basal drag can induce substantial shearing through the ice column,  
94 resulting in a depth-variable velocity profile. Slip length is thus a useful metric for  
95 distinguishing the ice-flow regime.

96

97 We compare slip lengths calculated from our modeled parameter fields to slip lengths  
98 calculated using analytic theory for form drag for ice flow over an undulating bed that requires  
99 only bed roughness power spectra as an input (Schoof, 2002). Similar to Hogan et al. (2020),  
100 we approximate one-sided periodograms of the along-flow bed roughness profiles derived  
101 from the radar swath topographies (Holschuh et al., 2020) using an inverse square power law  
102 (equivalent to a random-walk elevation profile), where the periodogram component ( $P_n$ )  
103 associated with each frequency band can be fit by:

104

$$P_n = A f_n^{-2} \quad (2)$$

105 where  $A$  is a fit coefficient with units of length and  $f_n = n/a$  is the center frequency of a  
106 frequency band of width  $1/a$ ,  $a$  is the length of the fit window, and  $n = 1 \dots N$  with  $N$  being  
107 the total number of components in the periodogram (here  $N=256$ ). Following Schoof (2002)  
108 and Hogan et al. (2020), for sufficiently high wavenumbers ( $k_n \gg 1/H$  where  $H$  is ice  
109 thickness) the basal drag components are given by:

110

$$\beta_n = 16\eta\pi^3 A a^{-1} f_n. \quad (3)$$

111 The total form drag coefficient can then be approximated by:

112

$$\beta = \sum_{n=1}^N \beta_n = 16\eta\pi^3 A a^{-2} \sum_{n=1}^N n = 8\eta\pi^3 A a^{-2} N(N+1) \quad (4)$$

113

114 and if  $\lambda_n \ll a$  so  $N \gg 1$ , then

115

$$\beta = 8\eta\pi^3 A \lambda_N^{-2}. \quad (5)$$

116

117 Applying the definition of slip length then gives:

118

$$L = \frac{\lambda_N^2}{8\pi^3 A}. \quad (6)$$

119 We apply this analytic theory to our swath topographies to calculate the slip lengths  
120 associated with form drag. First, we extract bed topography at 25m posting from the radar  
121 swath topography point cloud (Holschuh et al., 2020) at each point in the point cloud along  
122 6.4km long flowlines (distance chosen to be similar to Hogan et al. (2020)) determined using  
123 the simulation reference surface velocity field. After removing the linear trend from the bed  
124 elevation profile and applying a Hamming window, we calculate the one-sided periodogram  
125 using Welch’s method (Welch, 1967). The inverse square power law coefficient  $A$  was  
126 calculated using non-linear least squares fitting. The slip length calculated following Equation  
127 6 is plotted at the center point of each flowline.  
128

## 129 **S5. Consistency with observed subglacial lake activity?**

130 An active subglacial lake boundary (lake Thw124; Smith et al., 2017) identified from satellite  
131 altimetry lies partially within the lower Thwaites grid. The inferred shear stress inside the lake  
132 boundary is nonzero. Satellite observations suggest variability in the lake fill-drain levels on  
133 Thwaites Glacier (Hoffman et al., 2020), so volume change estimates of lakes on Thwaites  
134 Glacier derived from satellite altimetry are difficult to relate to changes in lake geometry.  
135 Because the lake geometry is unknown for the observational period used to constrain the  
136 snap-shot inversions, we do not know how much of the lake is buoyantly supporting the  
137 overlying ice. This lake had drained prior to the epoch of the surface observations used to  
138 constrain the inversion, so the non-zero drag may be evidence of ice regrounding; however,  
139 independent GNSS observations suggest that ice velocity is insensitive to lake fill-drain cycles,  
140 which would predict low shear stress values in the vicinity of the Thwaites lakes independent  
141 of whether the lake is full or empty (Hoffman et al., 2020). The nonzero drag inside the lake  
142 could also represent resistance from topographic pinning points that may always protrude  
143 above the reported lake depth (Smith et al., 2017; Hoffman et al., 2020), which at ~20 m, is  
144 below the root mean square amplitude of subglacial roughness in the boundary of the lake  
145 and motivates further study of lake influence on ice-sheet mechanics and glacier sliding.  
146 In the two-dimensional spectral variance of 6.0 km windowed bed topography, we see the first  
147 indication from independent subglacial datasets of spatial changes in bed properties  
148 consistent with the Thw124 lake position. Over the lake outline boundary, the bed appears to  
149 be substantially smoother than the surrounding topography (Figure 3A). The SAR focused  
150 radargrams, however, show no unambiguous evidence of an ice-lake interface. This suggests  
151 that there may not be dielectric contrast across the lake interface that is distinguishable from a  
152 wet sediment interface and/or that this interface is very rough.

## 153 **S6. Simulations over a uniformly sloped bed topography**

154 Fitting a plane to the high-resolution topographies, we can simulate ice flow over a flat bed for  
155 each grid. From these simulations we can relate the basal drag to the more the more  
156 traditional horizontal shear stress (a global variable) and compare again the resistance and  
157 normal pressure fields. The patterns of the inferred resistance fields are similar to the  
158 smoothed topographies. The cost per node for each grid is substantially higher than the  
159 isotropically smoothed experiments.



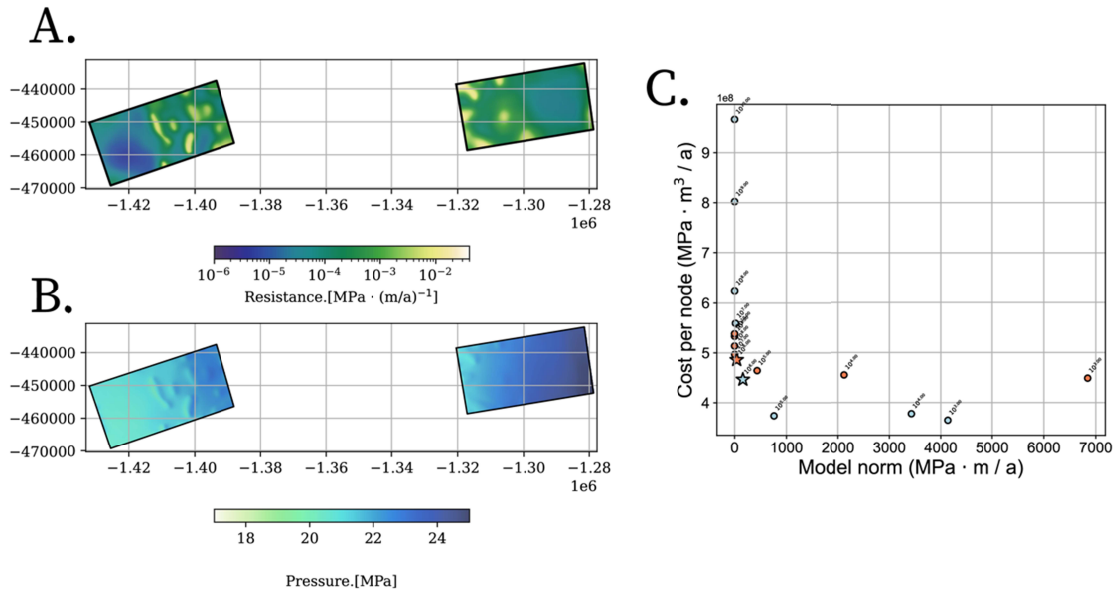

161  
 169 **Supplementary Figure 7.** (A) The basal resistance fields, (B) the normal pressure fields and  
 170 the (C) Tikhonov regularization curves (cost function plotted against the mean square gradient  
 171 of beta for  $\log_{10} \lambda = 10e^3, 10e^4, 10e^5, \dots 10e^{10}$  for the lower Thwaites (light blue) and the  
 172 upper Thwaites (coral) flat grids. Again, near  $10e^6$  the cost function increases dramatically,  
 173 and the L-curve method would select a value in this range as the appropriate regularization  
 174 parameter (indicated with a star). The fields in (A) and (B) are the fields associated with this  
 175 choice of regularization. The cost per node for both simulations were 15% (lower thwaites)  
 176 and 5% (upper thwaites) greater than the most isotropically smoothed experiments.

170 **References**

176 Hogan, K. A., R. D. Larter, A. G. C. Graham, R. Arthern, J. D. Kirkham, R. Totten Minzoni, T. A.  
 177 Jordan, R. Clark, V. Fitzgerald, A. K. Wåhlin, J. B. Anderson, C.-D. Hillenbrand, F. O. Nitsche, L.  
 178 Simkins, J. A. Smith, K. Gohl, J. E. Arndt, J. Hong, and J. Wellner, 2020. Revealing the former bed  
 179 of Thwaites Glacier using sea-floor bathymetry: implications for warm-water routing and bed  
 180 controls on ice flow and buttressing. *The Cryosphere* 14, 2883–2908, doi:10.5194/tc-14-2883-  
 181 2020.

177  
 180 Holschuh, N., K. Christianson, J. Paden, R. B. Alley, and S. Anandakrishnan, 2020. Linking  
 181 postglacial landscapes to glacier dynamics using swath radar imaging at Thwaites Glacier,  
 182 Antarctica. *Geology* 48, 268–272, doi: 10.1130/G46772.1.

181  
 184 Hoffman, A., K., Christianson D., Shapero B., Smith, I., Joughin (2020), Heterogenous thinning  
 185 and subglacial lake drainage on Thwaites Glacier, *The Cryosphere*. 14(12), 4603–4609.  
 186 doi:10.5194/tc-14-4603-2020

185  
 187 Schoof, C., 2002. Basal perturbations under ice streams: form drag and surface expression.  
 188 *Journal of Glaciology* 48, 407–416.

188

188 Smith, B., N., Gourmelen, A., Huth, and I., Joughin (2017), Connected subglacial lake drainage  
189 beneath Thwaites Glacier, West Antarctica. *The Cryosphere*. 11, 451–467. doi:10.5194/tc-11-  
190 451-2017  
191  
192 Welch, P. D., 1967. The Use of Fast Fourier Transform for the Estimation of Power Spectra: A  
193 Method Based on Time Averaging Over Short, Modified Periodograms. *IEEE Transactions on*  
194 *Acoustics, Speech, and Signal Processing* 15, 70–73.
